# Supplementary material for: A dark-field light scattering platform for real-time monitoring of the erosion of microparticles by Co2+
Source: Royal Society of Chemistry journal article supplement (doi:10.1039/c4an00353e), 2014-01-01
Supplement: c4an00353e2.pdf [file c4an00353e2.pdf]

## Electronic Supporting Information

for

A dark field light scattering platform for real-time monitoring  
the erosion of microparticles  $\text{Co}^{2+}$

Hui Yang,<sup>a</sup> Yue Liu,<sup>a</sup> Peng Fei Gao,<sup>b</sup> Jian Wang\*<sup>b</sup> and Cheng Zhi Huang\*<sup>a, b</sup>

<sup>a</sup> Key Laboratory of Luminescence and Real-Time Analytical Chemistry (Southwest University),  
Ministry of Education, College of Chemistry and Chemical Engineering, Southwest University,  
Chongqing, PR China.

<sup>b</sup> College of Pharmaceutical Sciences, Southwest University, Chongqing, PR China.

*\*To whom correspondence should be addressed. Fax: 86-23-68254659; Tel: +86-23-68367257;*

*E-mail: chengzhi@swu.edu.cn*

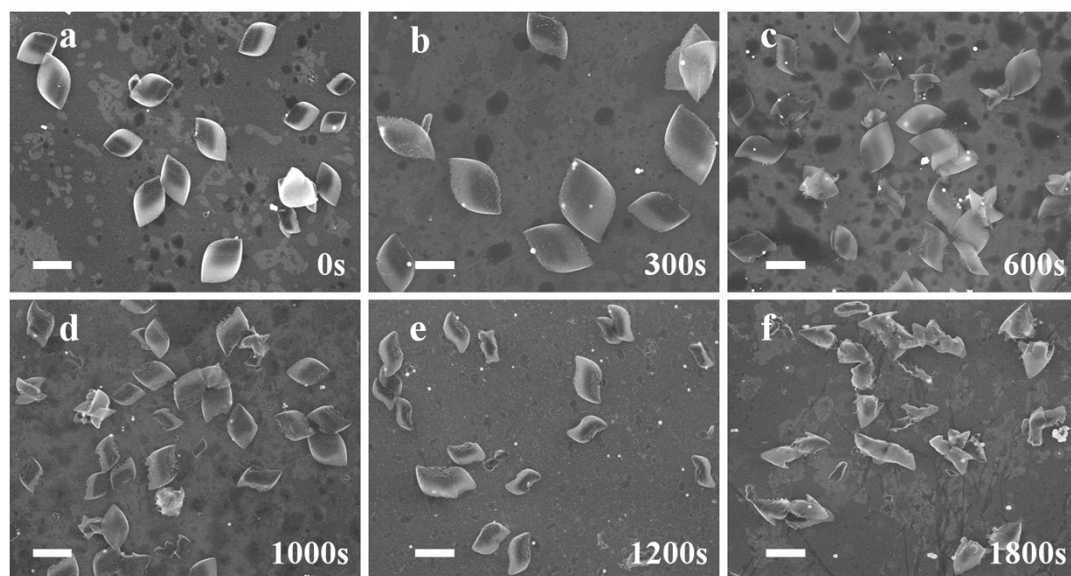

**Fig. S1.** SEM images of PpPD microparticles erode by  $\text{Co}^{2+}$  at different studied time points.  $c_{\text{Co}^{2+}} = 1 \times 10^{-4}$  mol/L. The image scale bar corresponds to 1  $\mu\text{m}$ .

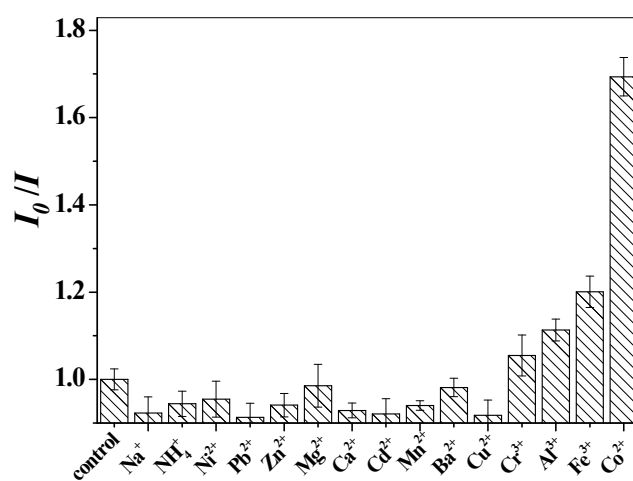

**Fig. S2.** Study of the selectivity of  $\text{Co}^{2+}$  in the erosion of PpPD microparticles. Where  $I_0$  and  $I$  were the dark field scattering intensity of PpPD before and after the reaction with the tested cation solution for 30 min.

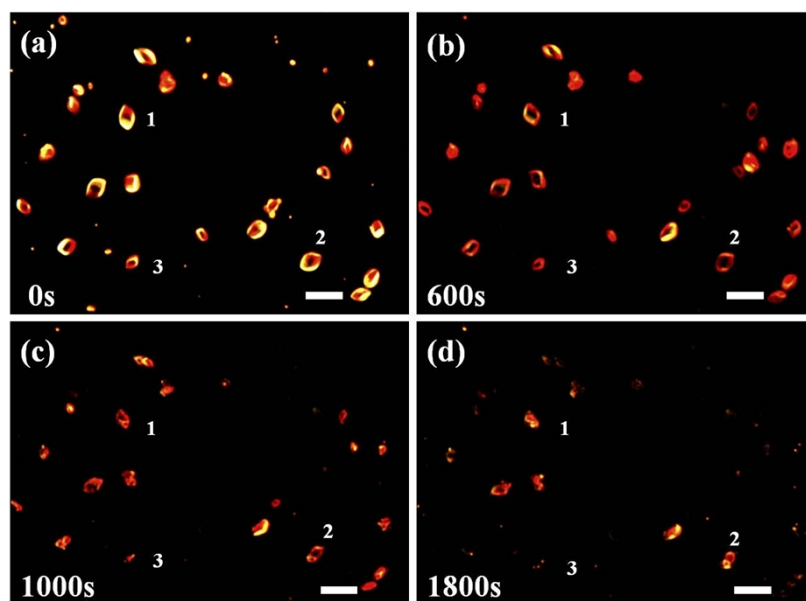

**Fig. S3** Dark-field image of PpPD undergoing erosion by  $\text{Co}^{2+}$ . The times at which the different images were captured are shown with latency time of 400/800 s.  $c_{\text{Co}^{2+}} = 1 \times 10^{-4}$  mol/L. The image scale bar corresponds to 1  $\mu\text{m}$ .

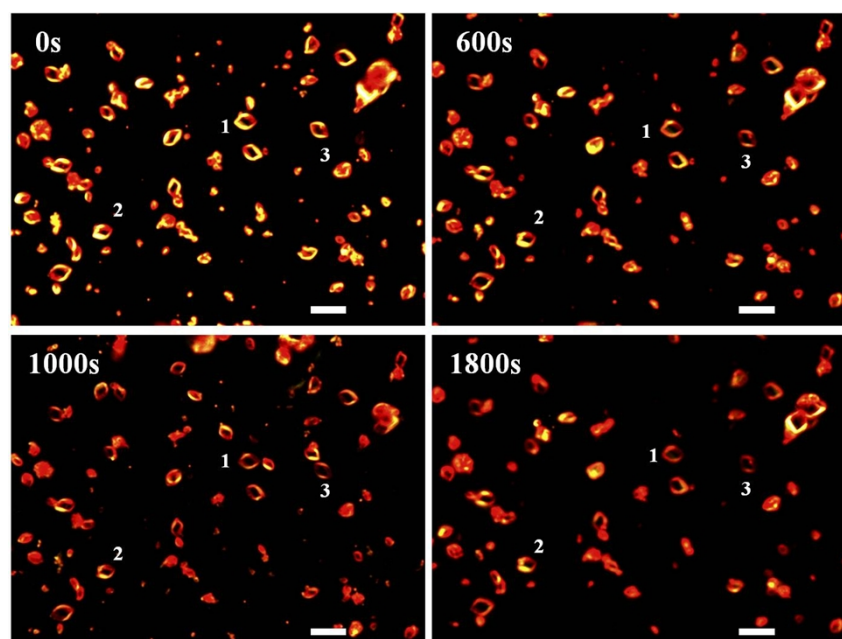

**Fig. S4** Dark-field image of PpPD undergoing erosion by  $\text{Co}^{2+}$ . The times at which the different images were captured are shown with latency time of 400/800 s.  $c_{\text{Co}^{2+}} = 1 \times 10^{-5}$  mol/L. The image scale bar corresponds to 1  $\mu\text{m}$ .

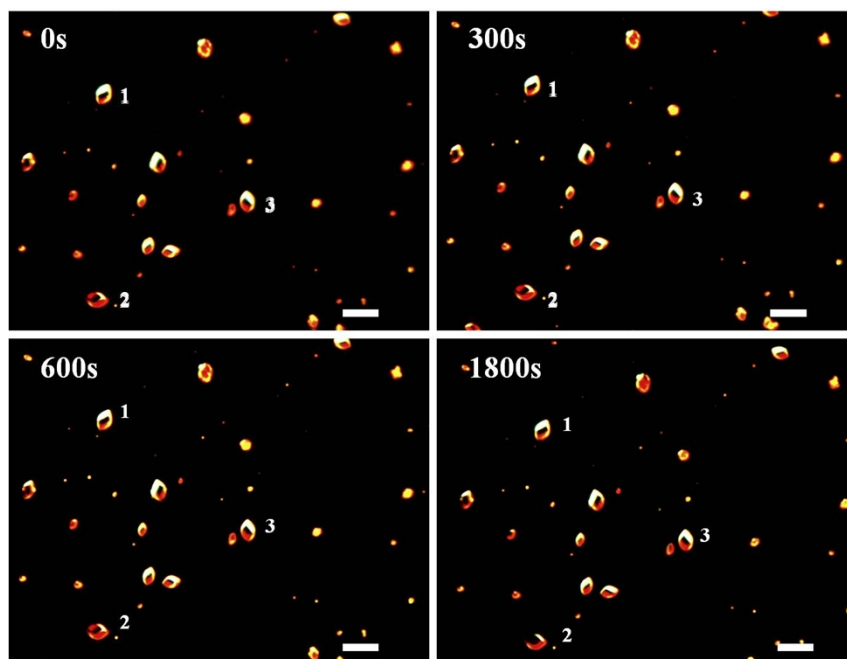

**Fig. S5** Dark-field image of PpPD undergoing erosion by Co<sup>2+</sup>. The times at which the different images were captured are shown with latency time of 400/800 s.  $c_{Co^{2+}} = 1 \times 10^{-6}$  mol/L. The image scale bar corresponds to 1 μm.

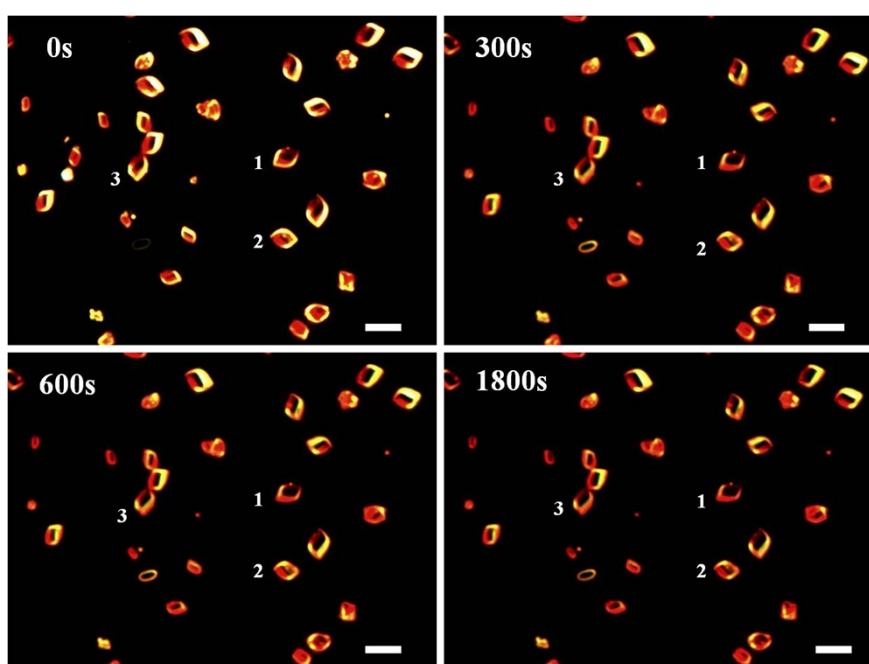

**Fig. S6** Dark-field image of PpPD undergoing erosion by Co<sup>2+</sup>. The times at which the different images were captured are shown with latency time of 400/800 s.  $c_{Co^{2+}} = 1 \times 10^{-7}$  mol/L. The image scale bar corresponds to 1 μm.

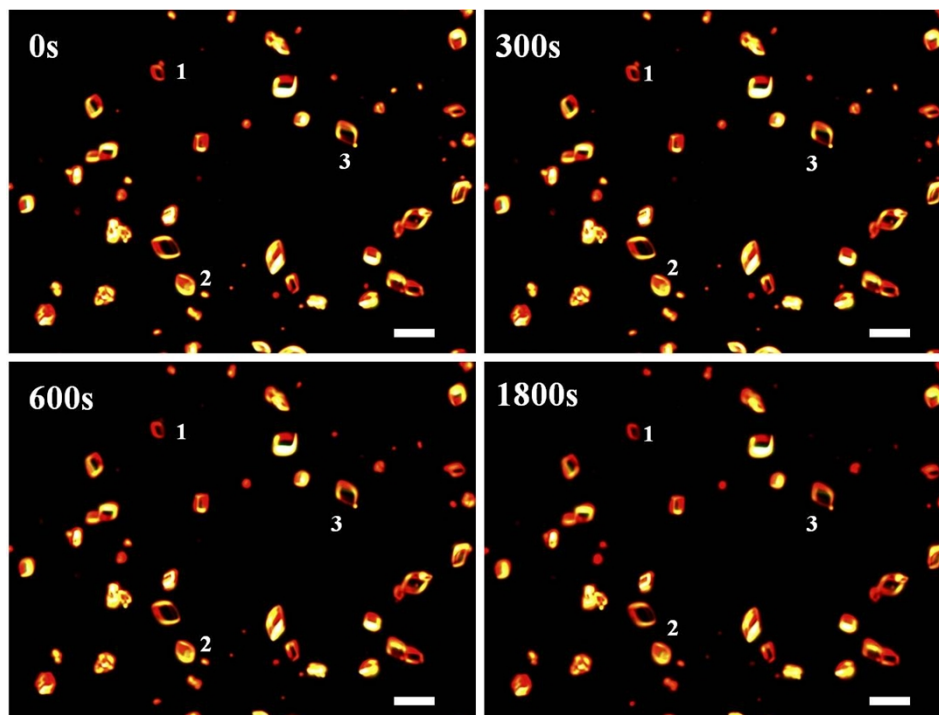

**Fig. S7** Dark-field image of PpPD undergoing erosion by  $\text{Co}^{2+}$ . The times at which the different images were captured are shown with latency time of 400/800 s.  $c_{\text{Co}^{2+}} = 1 \times 10^{-8}$  mol/L. The image scale bar corresponds to 1  $\mu\text{m}$ .

**Table S1** Correlation coefficients and linear equations of the calibration graphs for  $\text{Co}^{2+}$ .

| $\text{Co}^{2+}$ concentration | Linear regression equation/ $\mu\text{M}$ | Correlation coefficient $r$ |
|--------------------------------|-------------------------------------------|-----------------------------|
| $10^{-3}$ mol/L                | $F = 1.01 - 0.0229 c$                     | 0.9984                      |
| $10^{-4}$ mol/L                | $F = 1.01 - 0.0155 c$                     | 0.9933                      |
| $10^{-5}$ mol/L                | $F = 1.02 - 0.00861 c$                    | 0.9833                      |
| $10^{-6}$ mol/L                | $F = 1.01 - 0.00749 c$                    | 0.9809                      |
| $10^{-7}$ mol/L                | $F = 1.00 - 0.00567 c$                    | 0.9875                      |
| $10^{-8}$ mol/L                | $F = 0.958 - 0.0239 c$                    | 0.9903                      |
